# Supplementary material for: Comparing Endovascular Treatment Methods in Acute Ischemic Stroke Due to Tandem Occlusion Focusing on Clinical Aspects
Source: MDPI journal article supplement (doi:10.3390/life11050458), 2021-05-20
Supplement: s1 [file s1]

**Table S1.** Evaluated parameters in patients with and without sICH.

|                                                      | sICH<br>(N = 7) | non-sICH<br>(N = 94) | <i>p</i> value   |
|------------------------------------------------------|-----------------|----------------------|------------------|
| Age, years, mean ( $\pm$ SD)                         | 70 $\pm$ 10     | 67 $\pm$ 10          | 0.512            |
| Gender, female, % (n)                                | 28.6 (2)        | 39.4 (37)            | 0.572            |
| Smoking, % (n)                                       | 57.1 (4)        | 61.9 (39)            | 0.806            |
| Alcohol, % (n)                                       | 42.9 (3)        | 34.9 (22)            | 0.678            |
| Hypertension, % (n)                                  | 42.9 (3)        | 72.8 (67)            | 0.093            |
| Diabetes mellitus, % (n)                             | 14.3 (1)        | 20.9 (19)            | 0.677            |
| Atrial fibrillation, % (n)                           | 0 (0)           | 21.3 (20)            | 0.173            |
| Dyslipidaemia, % (n)                                 | 57.1 (4)        | 44.0 (40)            | 0.499            |
| Previous stroke % (n)                                | 0 (0)           | 19.3 (17)            | 0.234            |
| API at admission, % (n)                              | 14.3 (1)        | 23.0 (20)            | 0.595            |
| OAC at admission, % (n)                              | 0 (0)           | 9.2 (8)              | 0.402            |
| Primary transport, % (n)                             | 85.7 (6)        | 45.7 (43)            | <b>0.041</b>     |
| NIHSS baseline, median (IQR)                         | 10 (5–17)       | 12 (9–16)            | 0.252            |
| ASPECT score, median (IQR)                           | 8 (7–9)         | 9 (8–9)              | 0.225            |
| mCTA score, median (IQR)                             | 3 (3–3)         | 4 (3–4)              | 0.089            |
| IVT prior MT, % (n)                                  | 28.6 (2)        | 26.6 (25)            | 0.909            |
| First pass effect, % (n)                             | 33.3 (2)        | 54.9 (50)            | 0.304            |
| TICI $\geq$ 2b, % (n)                                | 71.4 (5)        | 84.0 (79)            | 0.390            |
| Symptom onset to arterial puncture time median (IQR) | 423 (334–785)   | 330 (228–623)        | 0.471            |
| Puncture to revascularization time, median (IQR)     | 54 (48–63)      | 45 (32–65)           | 0.752            |
| Symptom onset to revascularization, median (IQR)     | 518 (463–818)   | 393 (275–703)        | 0.444            |
| Complications, % (n)                                 | 28.6 (2)        | 6.4 (6)              | <b>0.036</b>     |
| Distal emboli, % (n)                                 | 0 (0)           | 34.8 (32)            | 0.058            |
| 90 day mRS $\leq$ 2, % (n)                           | 16.7 (1)        | 56.0 (51)            | 0.061            |
| 90 day mortality, % (n)                              | 83.3 (5)        | 16.5 (15)            | <b>&lt;0.001</b> |

Abbreviations: sICH, symptomatic intracranial hemorrhage; SD, standard deviation; API, antiplatelet inhibitor; OAC, oral anticoagulant; IQR, interquartile range; NIHSS, National Institutes of Health Stroke Scale; ASPECT, Alberta Stroke Program Early CT Score; mCTA, multiphase CT-angiography; IVT, intravenous thrombolysis; TICI, Thrombolysis in Cerebral Infarction; mRS, modified Rankin Scale.
